# Supplementary material for: In situ formation of MoS2/C nanocomposite as an anode for high-performance lithium-ion batteries
Source: Royal Society of Chemistry journal article supplement (doi:10.1039/c6ra22462h), 2016-01-01

## Supporting Information

### ***In situ* formation of MoS<sub>2</sub>/C nanocomposite as an anode for high-performance lithium-ion batteries**

Gyu-Ho Lee,<sup>a</sup> Si-Jin Kim,<sup>a</sup> Min-Cheol Kim,<sup>a</sup> Hui-Seon Choe,<sup>a</sup> Da-Mi Kim,<sup>a</sup> Sang-Beom Han,<sup>a</sup> Da-Hee Kwak,<sup>a</sup> Jae Hyun Jeong,<sup>a</sup> Kyung-Won Park\*<sup>a</sup>

*Department of Chemical Engineering, Soongsil University, Seoul 156-743, Republic of Korea*

[kwpark@ssu.ac.kr](mailto:kwpark@ssu.ac.kr).

Supporting materials include:

Part I. Supplementary figures

**Figure S1.** XPS spectra of the as-prepared samples. High-resolution spectra of Mo3d, S2p, and C1s peaks for MoS<sub>2</sub>-only((a),(e),(i)), MoS<sub>2</sub>/C-1((b),(f),(j)), MoS<sub>2</sub>/C-3((c),(g),(k)), and MoS<sub>2</sub>/C-5((d),(h),(l)).

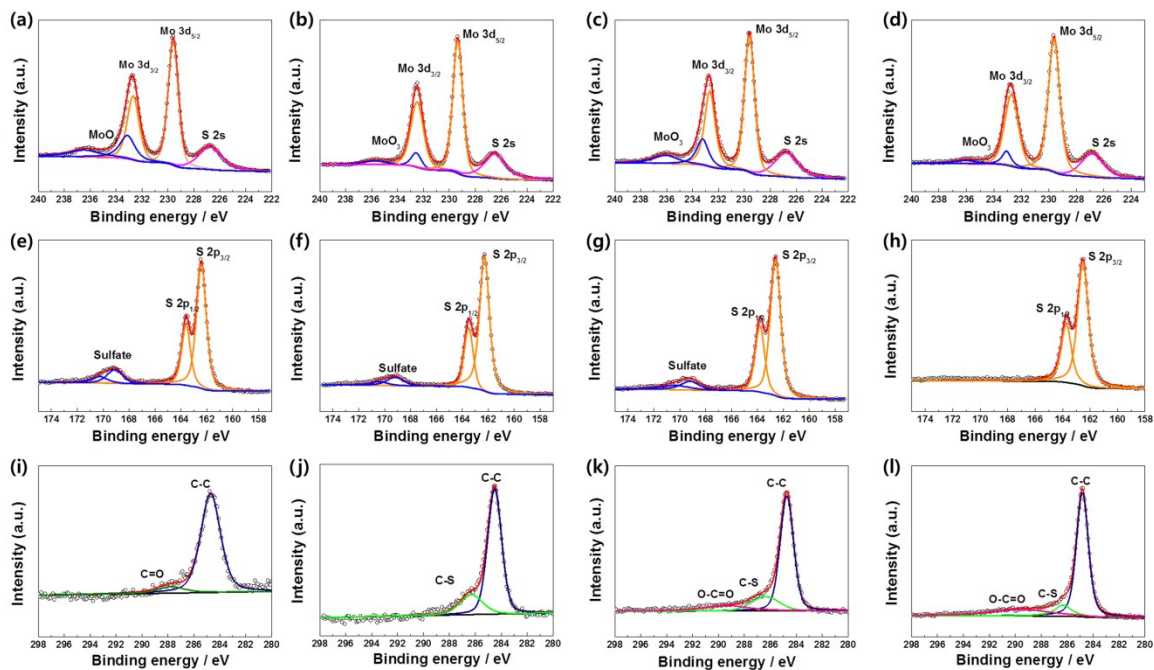

**Figure S2.** SEM and mapping images of (a) MoS<sub>2</sub>-only, (b) MoS<sub>2</sub>/C-1, (c) MoS<sub>2</sub>/C-3, and (d) MoS<sub>2</sub>/C-5.

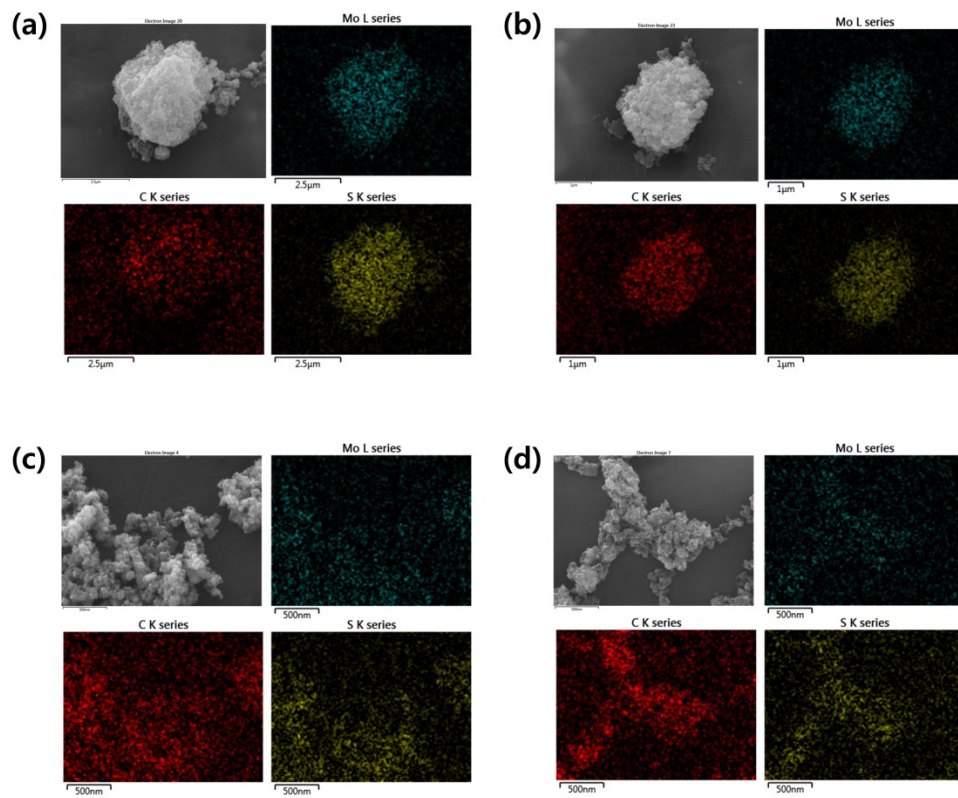

**Figure S3.** Nitrogen adsorption/desorption isotherms and pore size distributions of (a),(b) MoS<sub>2</sub>-only, (c),(d) MoS<sub>2</sub>/C-1, (e),(f) MoS<sub>2</sub>/C-3, and (g),(h) MoS<sub>2</sub>/C-5.

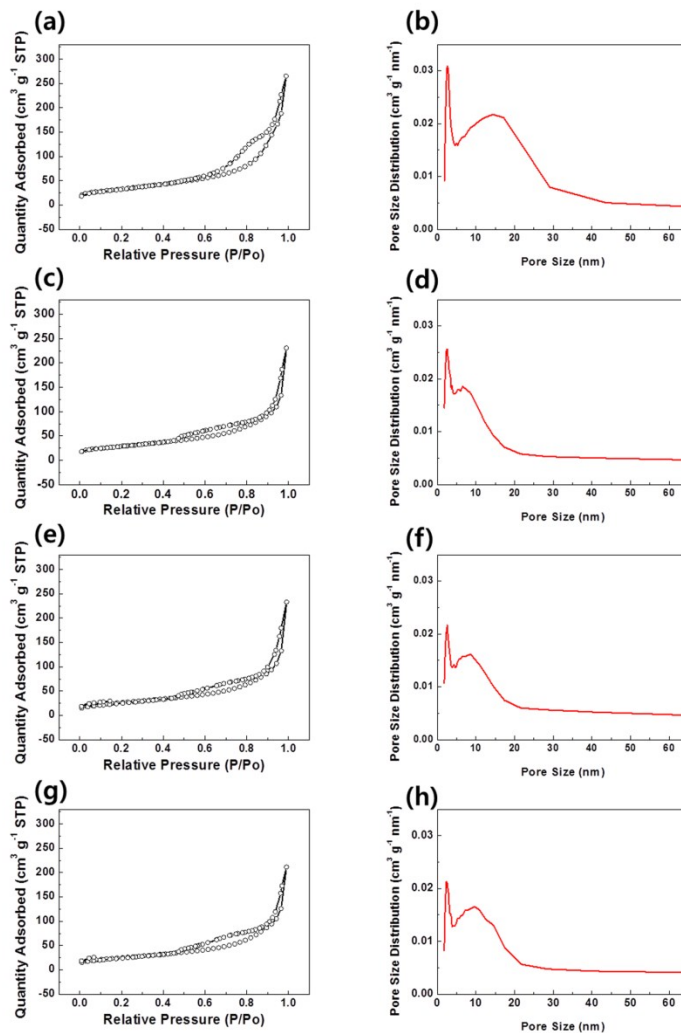

**Figure S4.** TGA curves of (a) MoS<sub>2</sub>-only, (b) MoS<sub>2</sub>/C-1, (c) MoS<sub>2</sub>/C-3, and (d) MoS<sub>2</sub>/C-5.

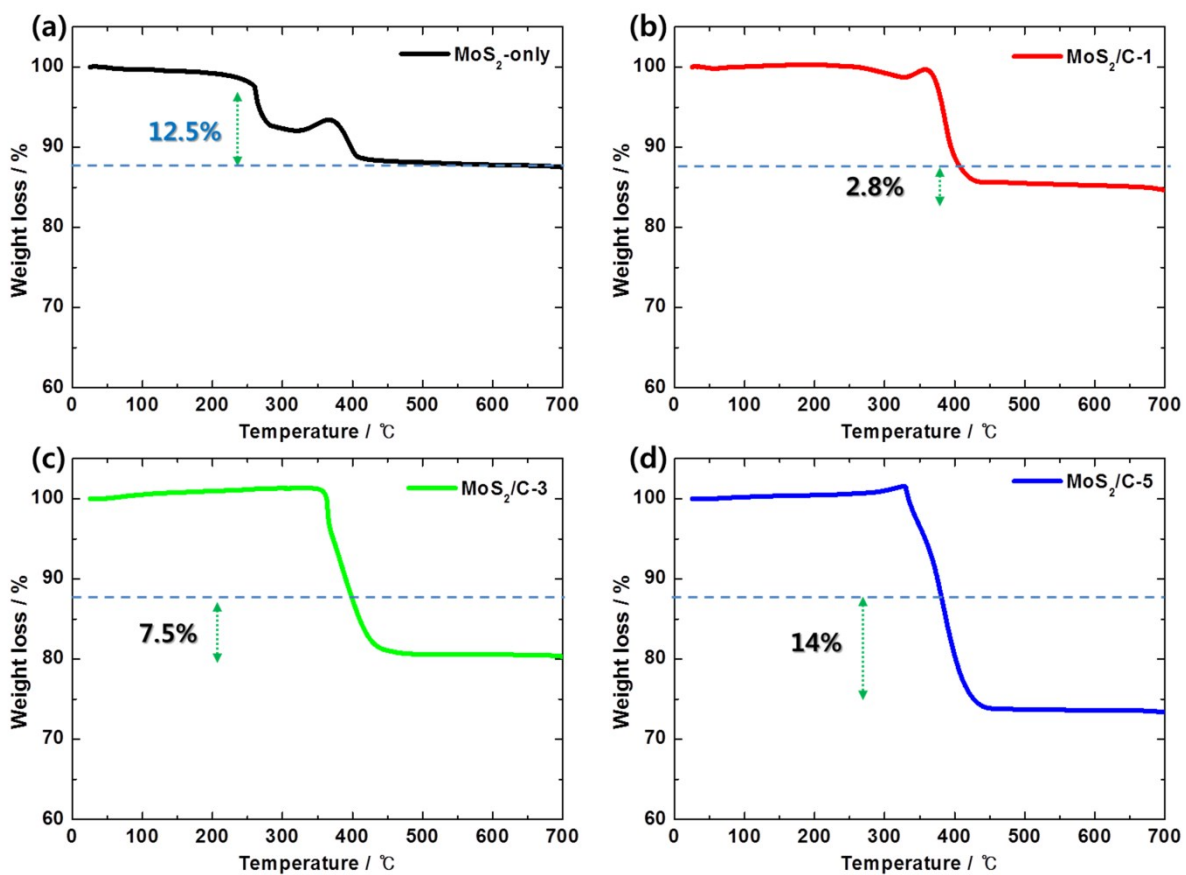

Figure S5. Comparison of electrical conductivity of the as-prepared samples.

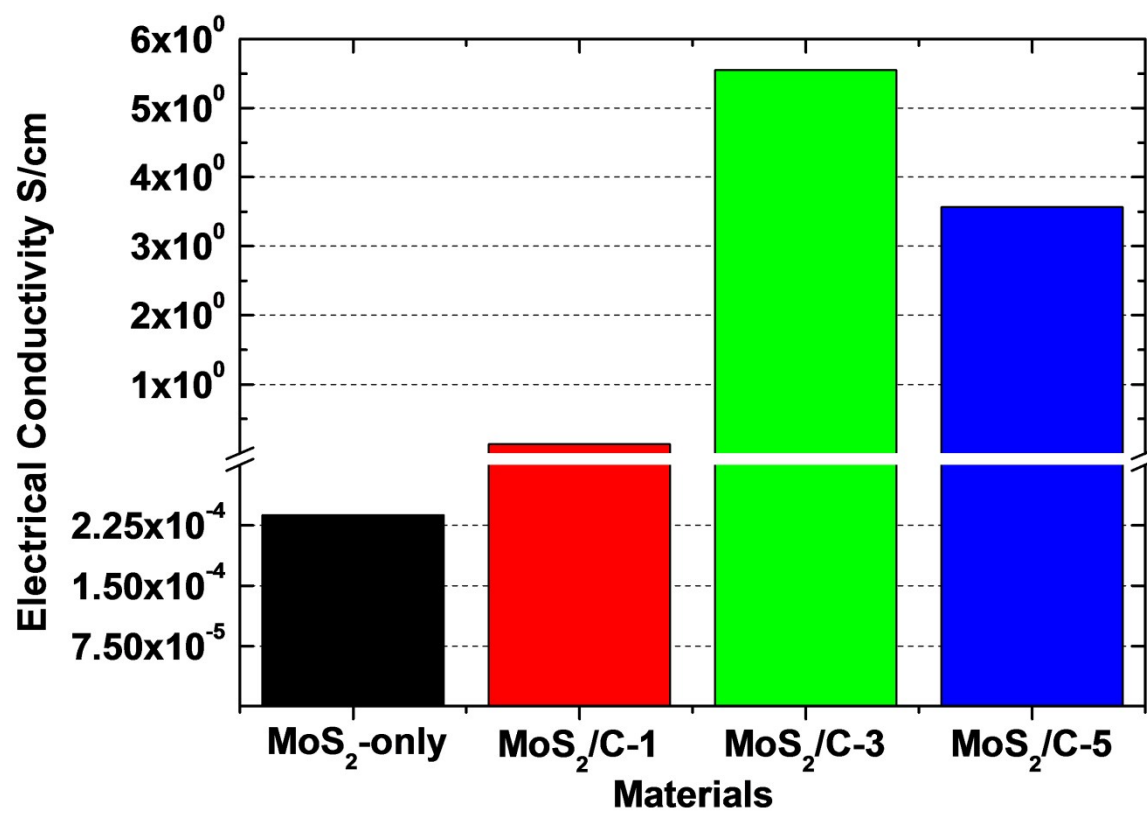

**Figure S6.** SEM images of (a) MoS<sub>2</sub>-only, (c) MoS<sub>2</sub>/C-1, (e) MoS<sub>2</sub>/C-3, and (g) MoS<sub>2</sub>/C-5 before the cycling process. (b) MoS<sub>2</sub>-only, (d) MoS<sub>2</sub>/C-1, (f) MoS<sub>2</sub>/C-3, and (h) MoS<sub>2</sub>/C-5 after 100 cycles at a current density of 500 mA g<sup>-1</sup>.

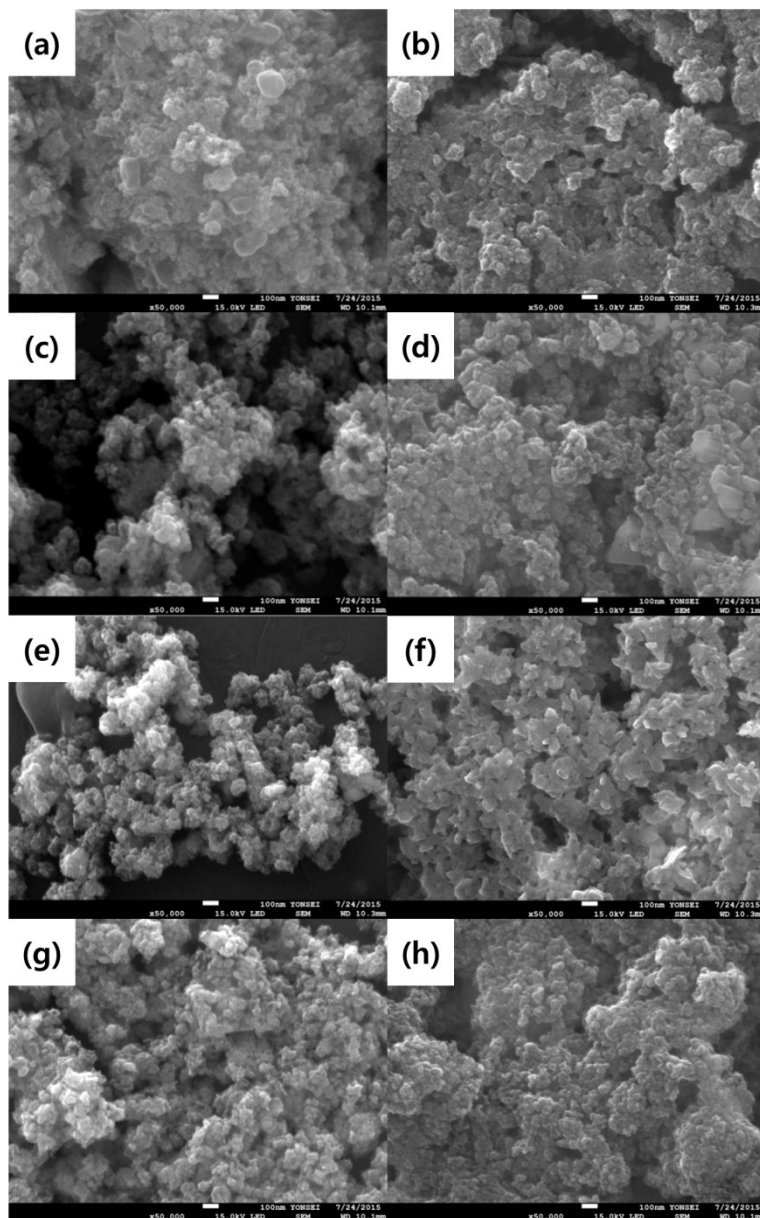

Supplement: c6ra22462h1.pdf [file c6ra22462h1.pdf]
